# Supplementary material for: Synthesis of mesoporous silica nanobamboo with highly dispersed tungsten carbide nanoparticles
Source: Royal Society of Chemistry journal article supplement (doi:10.1039/c2dt30248a), 2012-01-01
Supplement: c2dt30248a.pdf [file c2dt30248a.pdf]

Supporting information

## Synthesis of Mesoporous Silica Nanobamboo with Highly Dispersed Tungsten Carbide Nanoparticles

Yulin Huang,<sup>a</sup> Fei Deng,<sup>b</sup> Chaoying Ni,<sup>b</sup> Jingguang G. Chen,<sup>a\*</sup> Dionisios G. Vlachos<sup>a\*</sup>

*a* Catalysis Center for Energy Innovation, Center for Catalytic Science and Technology, Department of Chemical and Biomolecular Engineering, University of Delaware, Newark, DE 19716-3111; *b* Department of Materials Science & Engineering, University of Delaware, Newark, DE 19716-1501, USA

\*To whom correspondence should be addressed. E-mail: [jgchen@udel.edu](mailto:jgchen@udel.edu) (J.G.C.); [vlachos@udel.edu](mailto:vlachos@udel.edu)

(D.G.V.)

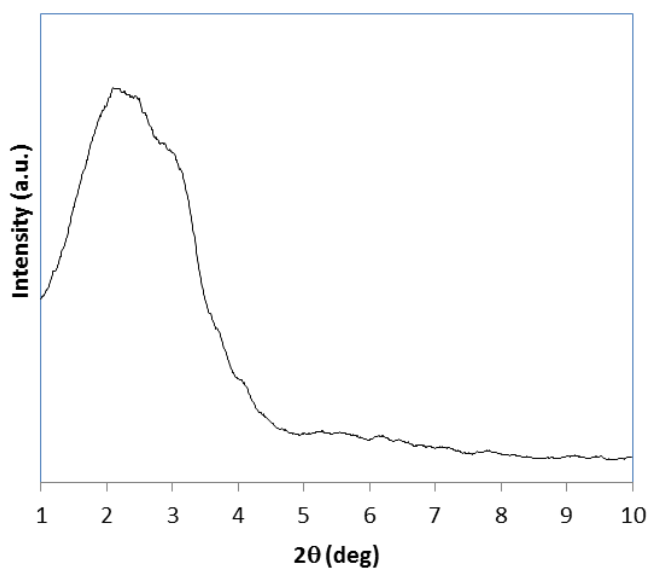

**Figure S1.** Small-angle X-ray diffraction of nanobamboo, indicating the mesoporous structure with  $d_{100} = 3.8$  nm. XRD patterns were recorded on a Phillips Norelco powder diffractometer using Cu K radiation (40 kV, 40 mA) at the rate of  $0.6^\circ \text{ min}^{-1}$  over the range  $2\theta = 1.0 - 10.0^\circ$ .

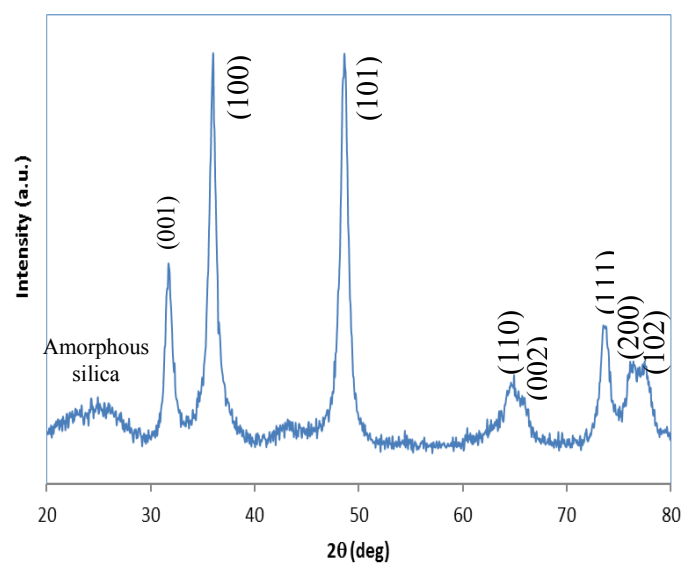

**Figure S2.** Large-angle X-ray diffraction of nanobamboo, indicating the pure phase of WC with amorphous silica.

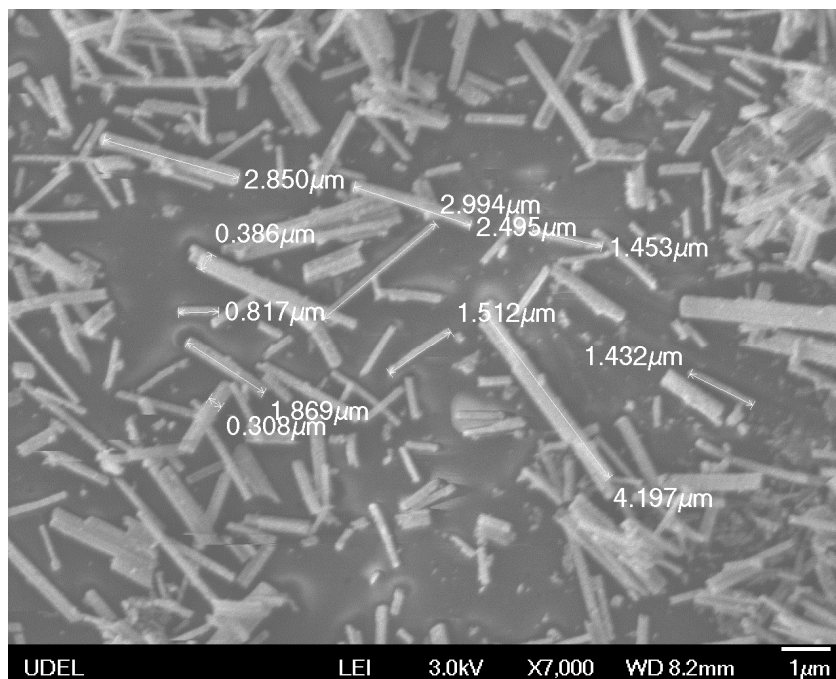

**Figure S3.** SEM image of nanobamboo material indicating the tube length varies from one to a few microns.

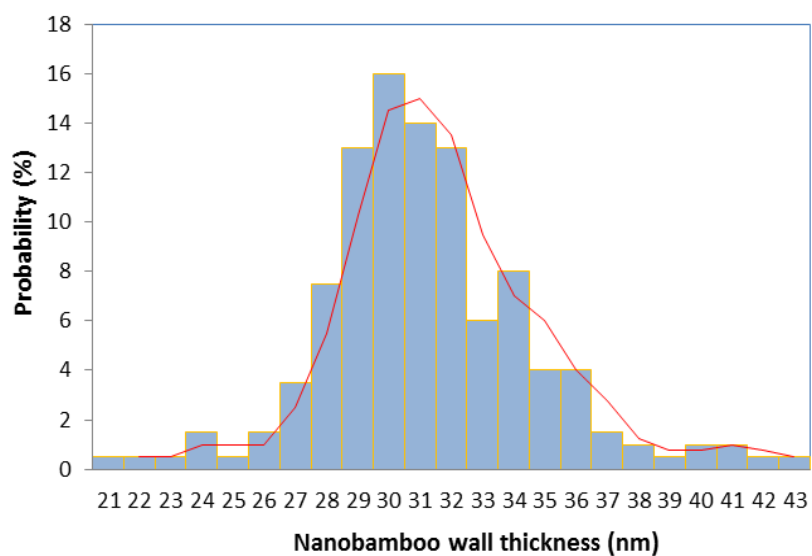

**Figure S4.** Wall thickness distribution of 200 nanobamboos.

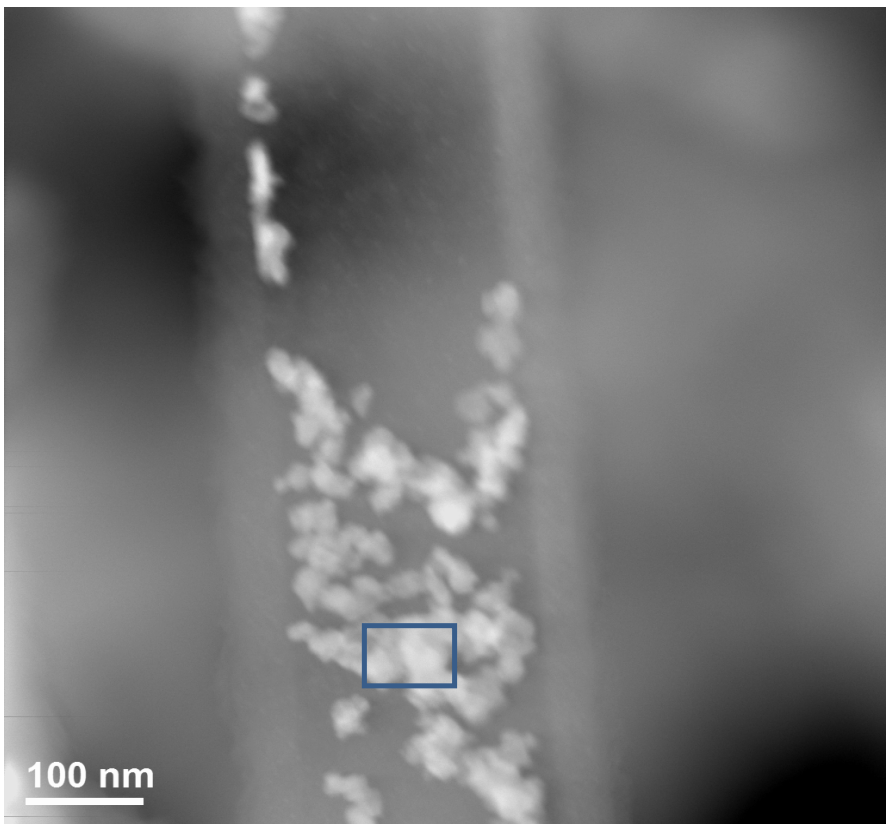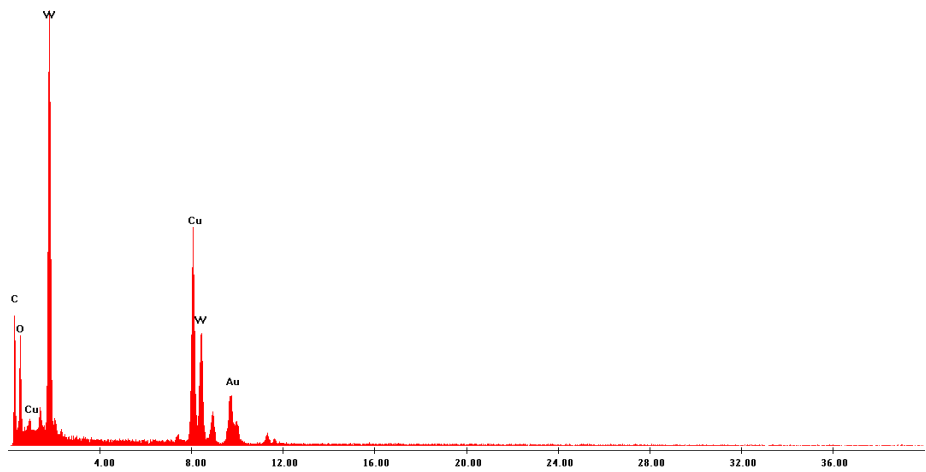

**Figure S5.** EDX analysis of the internode of a nanobamboo.

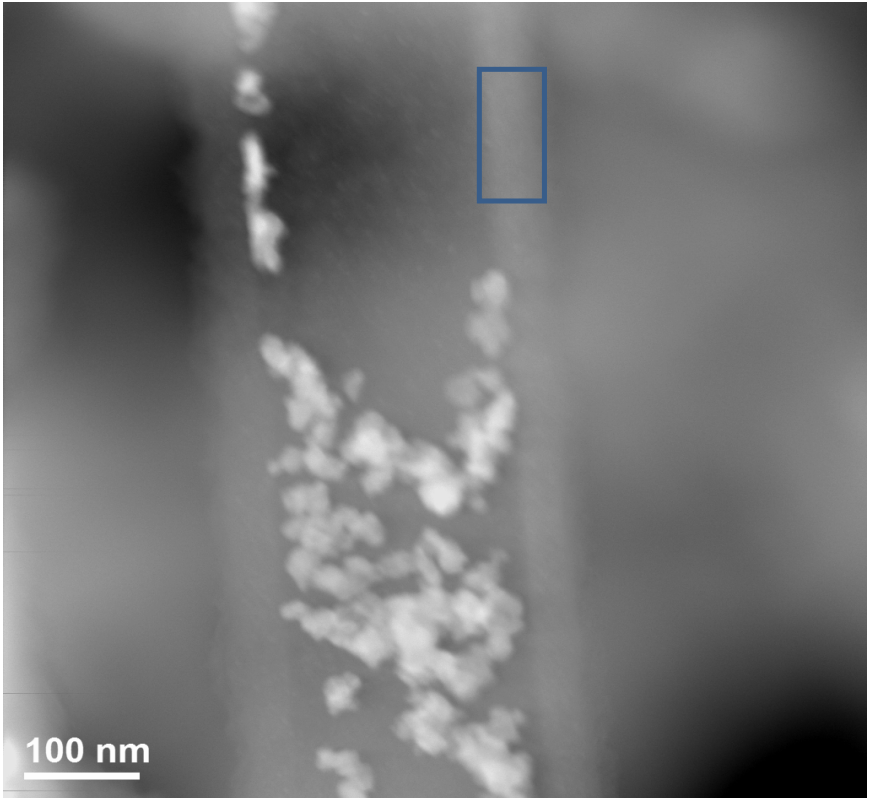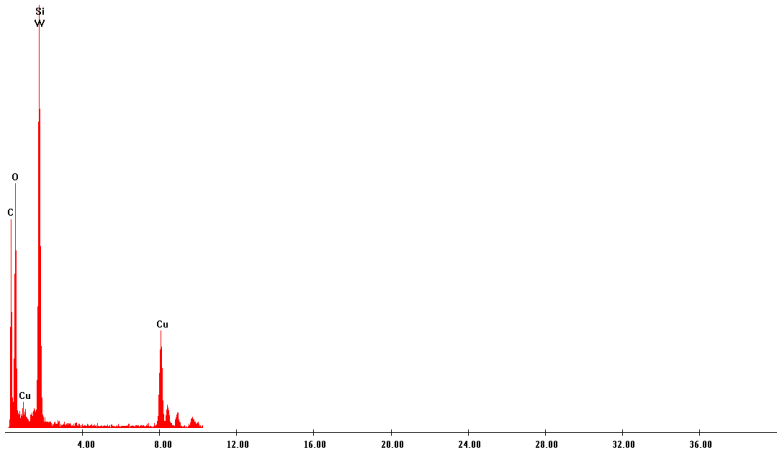

**Figure S6.** EDX analysis of the wall of a nanobamboo.
